1 Multimerization of *Homo sapiens* TRPA1 ion channel cytoplasmic domains

2 Gilbert Q. Martinez, Sharona E. Gordon\*

3 Department of Physiology and Biophysics, University of Washington, Seattle, Washington,

4 United States of America

5

6

7

8

9

10

11

12

13

14

15

16

17 \*Corresponding author

18 E-mail: [seg@uw.edu](mailto:seg@uw.edu)

19

## 20 **Abstract**

21 The transient receptor potential Ankyrin-1 (TRPA1) ion channel is modulated by myriad  
22 noxious stimuli that interact with multiple regions of the channel, including cysteine-  
23 reactive natural extracts from onion and garlic which modify residues in the cytoplasmic  
24 domains. The way in which TRPA1 cytoplasmic domain modification is coupled to opening  
25 of the ion-conducting pore has yet to be elucidated. The cryo-EM structure of TRPA1  
26 revealed a tetrameric C-terminal coiled-coil surrounded by N-terminal ankyrin repeat  
27 domains (ARDs), an architecture shared with the canonical transient receptor potential  
28 (TRPC) ion channel family. Similarly, structures of the TRP melastatin (TRPM) ion channel  
29 family also showed a C-terminal coiled-coil surrounded by N-terminal cytoplasmic  
30 domains. This conserved architecture may indicate a common gating mechanism by which  
31 modification of cytoplasmic domains can transduce conformational changes to open the  
32 ion-conducting pore. We developed an *in vitro* system in which N-terminal ARDs and C-  
33 terminal coiled-coil domains can be expressed in bacteria and maintain the ability to  
34 interact. We tested three gating regulators: temperature; the polyphosphate compound  
35 IP<sub>6</sub>; and the covalent modifier allyl isothiocyanate to determine whether they alter N- and  
36 C-terminal interactions. We found that none of the modifiers tested abolished ARD-coiled-  
37 coil interactions, though there was a significant reduction at 37°C. We found that coiled-  
38 coils tetramerize in a concentration dependent manner, with monomers and trimers  
39 observed at lower concentrations. Our system provides a method for examining the  
40 mechanism of oligomerization of TRPA1 cytoplasmic domains as well as a system to study  
41 the transmission of conformational changes resulting from covalent modification.

42

## 43 **Introduction**

44           The Transient Receptor Potential Ankyrin-1 (TRPA1) ion channel is expressed in  
45 nociceptors of the peripheral nervous system [1] where it is activated by a variety of  
46 noxious chemical stimuli including electrophilic covalent modifiers [1–3], non-covalent  
47 compounds [4], and temperature [5,6]. TRPA1 is also involved in inflammatory signaling [7]  
48 and has become an active therapeutic target for treatment of cough [8,9], itch [9,10], and  
49 pain [10,11].

50           Despite the importance of TRPA1 in sensing noxious stimuli, the structural  
51 mechanisms of channel activation remain unknown. Since there are multiple channel  
52 activators, both covalent and non-covalent, that likely bind to different regions of the  
53 channel [3,4,12], it is possible that TRPA1 undergoes different structural rearrangements  
54 during activation that depends on the ligand used. Indeed, Cavanaugh, Simkin, and Kim  
55 proposed early on that there are different functional states of human TRPA1, one that can  
56 be activated by covalent activators in the presence of intracellular polyphosphates and a  
57 state that can be activated by  $\Delta^9$ -tetra-hydrocannabinol in absence of intracellular  
58 polyphosphates but not covalent activators [13]. This suggests the existence of multiple  
59 structural states of the channel. Further, it was recently shown using limited proteolysis  
60 combined with mass spectrometry that different gating regulators of mouse TRPA1  
61 produced different patterns of proteolysis, consistent with each gating regulator producing  
62 unique structural rearrangements [14]. These observations point to the possibility of  
63 selectively targeting different activation pathways to regulate the channel. This could prove  
64 to be essential for effective pharmacological targeting of TRPA1 where it would be

65 advantageous to maintain normal sensory function while disrupting pathological pain  
66 sensations.

67 The recently published cryo-electron microscopy structure of human TRPA1 [15]  
68 revealed membrane topology of a typical voltage-gated ion channel consisting of six  
69 transmembrane domains, where the first four helices make up the voltage-sensing domain  
70 (VSD) and the remaining two helices composing the cation selective pore domain (Fig 1).  
71 The structure shows no high resolution density for the first ~440 N-terminal amino acids,  
72 which contain approximately ten ARDs, as well as portions of the C-terminus [15]. The  
73 resolved portion of the cytoplasmic domains consists of a C-terminal tetrameric coiled-coil  
74 surrounded by four groups of six N-terminal ankyrin repeat domains (ARDs) (Fig 1), an  
75 architecture seen in the TRPC ion channel family structures [16–18], but differing notably  
76 from the structure of TRPV1, another TRP channel expressed in nociceptors, that lacks  
77 the C-terminal coiled-coil [19–21]. Similar to TRPA1 and TRPC structures, the structures of  
78 the TRPM channel family also show a C-terminal coiled-coil surrounded by N-terminal  
79 protein domains, though these domains are not ARDs in the TRPM family [22–26].

80 **Fig 1. Structural features of human TRPA1.**

81 (A) Cartoon structure of human TRPA1 (3J9P) with one subunit highlighted in cyan. The C-  
82 terminal coiled-coil helices of all subunits are also shown in color. (B) The cytoplasmic  
83 domains showing the resolvable N-terminal ankyrin repeat domains of one subunit along  
84 with the coiled-coil. Ball-and-sticks on the coiled-coil helix are positively charged amino  
85 acids predicted to destabilize formation of the coiled-coil tetramer. Cysteine residues on  
86 the ankyrin repeat domains are also shown as ball-and-sticks. The asterisk indicates  
87 proposed IP<sub>6</sub> binding site and the red pound sign indicates the region increased  
88 proteolysis upon activation by the electrophilic compound NMM as determined by Samanta  
89 et al[14].

90  
91 Although the TRPA1 cryoEM structure provides a solid starting point to probe  
92 structural activation mechanisms, the structure provides no obvious way to determine how

93 conformational changes upon cysteine-modification by electrophilic compounds can be  
94 transmitted from the cytoplasmic domains to the ion-conducting pore. Using sequence  
95 analysis techniques, Palovcak et al hypothesized the importance of the voltage sensing  
96 domain in TRP channel gating by comparing large numbers of sequences of essentially  
97 non-voltage gated TRP channels with those of the heavily voltage-dependent  $K_V$  ion  
98 channels [27]. Based on this work, a recent study proposed a common pathway for TRP  
99 channel gating through a  $Ca^{2+}$  regulated intracellular cavity between the voltage sensor  
100 domain (VSD) and the pore domain [28], though no  $Ca^{2+}$  binding site was observed in the  
101 structure. Based on mutation and inter-species chimera approaches, Gupta et al suggest  
102 that the S4-S5 linker that bridges the VSD and the pore domain plays an important role in  
103 inhibition of human TRPA1 by the synthetic non-covalent channel modifier HC-030031 [4].  
104 Both the  $Ca^{2+}$  regulated intracellular cavity and S4-S5 linker are in close physical proximity  
105 to the large cytoplasmic domains, and could serve as conduit for conformational changes  
106 in the cytoplasmic domains being transmitted to open the ion-conducting pore.

107         Several studies have shown or implicated that the cytoplasmic domains of TRPA1  
108 are important for regulation by small molecule compounds. A number of cysteine residues  
109 in this region have been shown to be the main amino acids involved in activation by irritant  
110 compounds such as cinnamaldehyde and allyl isothiocyanate (AITC) [2,29,30]. Recently, it  
111 was shown that addition of an electrophilic compound to purified mouse TRPA1 resulted in  
112 altered proteolytic accessibility of a loop, highlighted in Fig 1B (red hash mark), between  
113 adjacent ARDs [14]. The conformational change required to alter proteolytic accessibility of  
114 this loop is unknown. Intracellular polyphosphates are another compound believed to  
115 interact with the cytoplasmic domains of TRPA1. It was shown that intracellular  
116 polyphosphates were required to maintain channel activation in excised patches [31].

117 Indeed, it has been reported that IP<sub>6</sub>, a polyphosphate compound, was required for  
118 purification of human TRPA1 [15], leading the authors to hypothesized that the negatively  
119 charged IP<sub>6</sub> molecule countered the positively charged amino acids (Fig 1) allowing for  
120 tetramerization of the coiled-coil domain [15].

121 TRPA1 is one of several TRP channels are known to be regulated by temperature  
122 [32,33]. The temperature dependence (cold or heat activation) of human TRPA1 remains  
123 controversial [5]. Further, whether TRP channels contain a distinct “temperature sensor” or  
124 have a diffuse set of amino acids that contribute to differences in heat capacity between  
125 the open and closed states [34] remains unknown. However, the temperature dependence  
126 of a prokaryotic sodium channel has been shown to be due to unwinding of a C-terminal  
127 coiled-coil, leading the authors to suggest a similar mechanism for the coiled-coil of  
128 TRPA1 [35]. If this model of TRPA1 temperature sensation is accurate, we should be able  
129 to see a temperature dependent unwinding of the TRPA1 coiled-coil. Since IP<sub>6</sub> is thought  
130 to interact with the coiled-coil [15], we might expect that this molecule alters biochemical  
131 properties of the cytoplasmic domains at elevated temperatures such as coiled-coil  
132 tetramerization, coiled-coil helix stability, or coiled-coil-ARD interactions.

133 We used isolated protein domains from human TRPA1 consisting of the C-terminal  
134 coiled-coil and the N-terminal ARDs to probe the role of IP<sub>6</sub>, temperature, and electrophilic  
135 activators on multimerization of the cytoplasmic domains. We showed that coiled-coil  
136 concentration is the primary determinant of tetramerization, but with a low affinity such that  
137 it is unlikely to be the primary driver of full-length channel tetramerization. We observed  
138 that IP<sub>6</sub> had no effect on the tetramerization of the coiled-coil, suggesting that the  
139 requirement of polyphosphates for TRPA1 function in excised patches is not simply due to

140 biochemical stabilization of the coiled-coil. We also showed that the CC helix unwinds  
141 ~25% as temperature is elevated, independent of IP<sub>6</sub>, but that the partial helix unwinding  
142 had no detectable impact on coiled-coil tetramerization. This is consistent with the model  
143 of partial helix unwinding leading to gating as proposed by Arrigoni et al [35]. Finally, we  
144 showed that neither removal of IP<sub>6</sub>, increasing temperature, nor addition of AITC abolished  
145 interactions between the coiled-coil and the ARDs. The system developed here maintains  
146 interactions observed in the full-length channel structure and can serve as a basis in which  
147 to study conformational changes in the cytoplasmic domains that result in channel  
148 activation.

## 149 **Results**

### 150 **IP<sub>6</sub> does not alter coiled-coil oligomerization**

151 In order to explore the role of TRPA1 cytoplasmic domains in channel modulation,  
152 we developed constructs suitable for biochemical characterization. The primary sequence  
153 of the human TRPA1 coiled-coiled consisting of amino acids A1036-T1078 (referred to as  
154 CC1) contains no tryptophan residues and few other residues that absorb at 280 nm  
155 making it difficult to observe in standard size exclusion chromatography with absorbance  
156 detection. Hence, in order to examine coiled-coil oligomerization we expressed CC1 as a  
157 maltose-binding protein (MBP) fusion (referred to as MBPCC1, Fig 2A). In addition to  
158 providing strong absorption signal at 280 nm this also allows for easy discrimination  
159 between monomeric fusion protein of ~50 kDa and tetrameric protein of ~200 kDa using  
160 size exclusion chromatography (SEC). MBPCC1 expressed robustly in *E. coli* and was  
161 used as a means to monitor oligomerization of the coiled-coil (Fig 2).

162 **Fig 2. Oligomerization of hTRPA1 coiled-coil.**

163 (A) Cartoon depicting the MBPCC1 fusion protein along with Coomassie-stained gels of  
164 purified MBPCC1, MBPCC2, and isolated CC1 protein. (B) SEC-MALS showing high  
165 concentration of MBPCC1 forming a tetramer (Mw calculated to be 203 kDa +/- 1.5%) in  
166 the absence of IP<sub>6</sub>. (C) SEC-MALS showing MBPCC1 at lower concentration is no longer  
167 tetrameric but containing a mix of trimers (Mw calculated to be 136 kDa) and monomers  
168 (Mw calculated to be 53 kDa) in the absence of IP<sub>6</sub>. For panels in (B) and (C), blue dots  
169 indicate absorbance at A280 and black or red dots indicate regions and values where Mw  
170 was calculated. (D), (E). SEC chromatograms of MBPCC1, MBPCC2, and a mixture of  
171 MBPCC1+MBPCC2 in the absence (D) or presence (E) of IP<sub>6</sub> showing no clear signs of  
172 interaction between CC1 and CC2.

173

174 We used size-exclusion chromatography combined with multi-angle light scattering  
175 (SEC-MALS) to get an accurate determination of the molecular weight of MBPCC1.  
176 MBPCC1 protein at 15 mg/ml (~300 μM) in the absence of IP<sub>6</sub> ran at a molecular weight  
177 consistent with a tetrameric protein on an SEC column and the molecular weight  
178 determined from light scattering was 203 kDa (+/- 1.5%) (Fig 2B). Tetrameric protein was  
179 observed in the absence of IP<sub>6</sub> during all stages of expression and purification, indicating  
180 that IP<sub>6</sub> was not required for coiled-coil solubility or tetramerization under our experimental  
181 conditions. When we diluted MBPCC1 to 1 mg/ul (~20 μM) and analyzed the protein with  
182 SEC-MALS we observed protein at 138 kDa (± 0.4%), a molecular weight in between that  
183 of a dimer and trimer as well as a peak consistent with a monomer (53 kDa) (Fig 2C).  
184 Thus, multimerization appeared to depend on the concentration of protein but not IP<sub>6</sub>.

185 When we ran the human TRPA1 protein sequence through the COILS  
186 algorithm[38], we noticed a second region consisting of amino acids D1082-K1113  
187 (referred to as CC2) that showed propensity for forming a coiled-coil. We tested whether a  
188 purified protein fragment corresponding to this region formed a coiled-coil *in vitro* by  
189 expressing it as an MBP fusion protein (MBPCC2). When MBPCC2 was run on SEC in the



190 absence or presence of IP<sub>6</sub> it eluted at a molecular weight consistent with a monomer (Fig  
191 2D,E). When we incubated purified MBPCC1 at a low concentration and MBPCC2  
192 together and ran the sample on SEC, the chromatograms showed no sign of heteromeric  
193 oligomerization between CC1 and CC2 in the absence or presence of IP<sub>6</sub> (Fig 2D,E).

### 194 **Isolated coiled-coil protein is helical and unwinds at room temperature**

195 It was recently shown that the unwinding of a C-terminal coiled-coil at increasing  
196 temperatures underlies temperature-sensitive gating of a prokaryotic sodium channel and  
197 it was suggested that a similar mechanism could be the case for TRPA1 [35]. We tested  
198 whether temperature would partially unwind CC1 and whether IP<sub>6</sub> would prevent this  
199 unwinding, testing the hypothesis that the functional requirement for IP<sub>6</sub> in excised patches  
200 is due to its stabilization of CC1.

201 We used circular dichroism spectroscopy (CD) on isolated CC1 (Fig 2A) to probe  
202 the helical content at increasing temperatures in the presence and absence of IP<sub>6</sub> (Fig 3).  
203 From 4°C to 47°C, there was a marked and reversible decrease in ellipticity of CC1 in the  
204 presence (Fig 3A) and absence of IP<sub>6</sub> (Fig 3B). When the ellipticity at 222 nm at different  
205 temperatures was normalized to the ellipticity at 222nm at 4°C we observed a reversible  
206 ~25% reduction, as temperature is increased to 42°C indicating that part of the coiled coil  
207 was reversibly lost as temperature was increased and that this occurred in an IP<sub>6</sub>-  
208 independent manner. Although these data are not sufficient to conclude that the partial  
209 unwinding of CC1 contributes to the temperature-dependent gating of TRPA1, they are  
210 consistent with the model proposed by Arrigoni et al [35].

### 211 **Fig 3. Helical unwinding of isolated CC1.**

212 (A and B) Far-UV CD spectrum of CC1 at different temperatures (4°C, 14°C, 24°C, 34°C,

213 37°C, 42°C, 47°C) in the absence (A) or presence (B) of IP<sub>6</sub>. C. Normalized ellipticity (to  
214 ellipticity measured at 4°C) at 222 nm (n=2).

215

## 216 **Concentration but not temperature or IP<sub>6</sub> determines CC1**

### 217 **multimerization**

218 We next sought to determine whether temperature would have an effect on  
219 oligomerization of CC1 in the presence and absence of IP<sub>6</sub>. MBPCC1 fusion protein  
220 without IP<sub>6</sub> was incubated at 4°C, 24°C, and 32°C and run on an SEC column equilibrated  
221 at the same temperature. These temperatures were chosen in part due to the amount of  
222 helical unwinding noticed in CD experiments as well as instrument limitations at higher  
223 temperature. Neither changing temperature nor IP<sub>6</sub> altered tetramerization as determined  
224 from the SEC profiles (Fig 4A), demonstrating that neither temperature nor IP<sub>6</sub> was a major  
225 factor in coiled-coil tetramerization under our conditions.

### 226 **Fig 4. Concentration, not temperature or IP<sub>6</sub>, is the primary driver of** 227 **tetramerization.**

228 A. SEC chromatograms of MBPCC1 at 4°, 24°, and 32°C. The instrument and column for  
229 T=24°C and T=32°C were the same (Superdex 200 Increases run on a Shimadzu system),  
230 but different from sample injected at 4C (Superdex 200 column and Akta Explorer). Both  
231 peaks are at molecular weights consistent with tetrameric protein at all temperatures  
232 tested. B and C. Protein at different concentrations (250 µM, 125 µM, 62.5 µM, 31.25 µM,  
233 15.625 µM, and 7.8125 µM) was injected at 24°C in the absence (B) and presence (C) of  
234 IP<sub>6</sub>. Insets show the normalized absorbance to highlight the shift in elution volume at lower  
235 concentrations. (D) Fraction of tetramer vs concentration (n=3 for each concentration).

236

237 The TRPA1 coiled-coil forms intersubunit interactions (Fig 1) that may contribute to  
238 the tetramerization of the full-length channel. It has previously been shown that the  
239 intracellular T1 domains of some voltage-gated potassium channels specify compatibility  
240 for tetramerization among different K<sub>V</sub> subunits [39,40]. We therefore tested whether the

241 TRPA1 coiled-coils could drive full-length channel tetramerization. We evaluated  
242 tetramerization of decreasing concentrations of MBPCC1 fusion protein in the presence or  
243 absence of IP<sub>6</sub> using size-exclusion chromatography (Fig 4C, D). The fraction of  
244 tetrameric MBPCC1 at different concentrations was the same in the presence or absence  
245 of IP<sub>6</sub> (Fig 4E). The concentration-tetramerization curve was half maximal in the  
246 concentration range of tens of micromolar. It seems unlikely that the micromolar  
247 concentrations required for tetramerization are the driver of full-length channel  
248 tetramerization. Rather, the tetramerization of the transmembrane domain likely increases  
249 the local concentration of CC1 to induce tetramerization of coiled-coil.

## 250 **Temperature, IP<sub>6</sub>, electrophilic compounds do not alter ARD-CC1** 251 **binding**

252 Since the full-length TRPA1 structure showed interactions between the C-terminal  
253 coiled-coil and the N-terminal ARDs we tested if our isolated coiled-coil protein could  
254 interact with isolated ARDs *in vitro*. To test this, we made a His-tagged construct  
255 containing amino acids 446-639, corresponding to ARDs with resolvable density in the  
256 human TRPA1 cryoEM structure. We then co-expressed this ARD construct with a His-  
257 tagged MBPCC1 construct or expressed ARD alone and tested whether the proteins co-  
258 purified with amylose affinity resin (Fig 5). As shown in the Western Blot analysis in Fig 5,  
259 we observed that ARD protein could be co-purified with MBPCC1 using amylose affinity  
260 chromatography with little or no ARD protein bound to amylose resin in absence of  
261 MBPCC1 (Fig 5).

### 262 **Fig 5. Interaction of MBPCC1 with the N-terminal ARD.**

263 A and B. Anti-His Western blots of amylose-resin purified protein from bacteria expressing  
264 both ARD and MBPCC1 or ARD alone. Incubation with resin and subsequent washing of

265 resin was carried out at 4°C (A) or 37°C (B). “I” indicates input sample and “Bound”  
266 indicates protein pulled down that remained after 4 wash steps. At each temperature  
267 lysates were incubated with IP<sub>6</sub> and/or AITC. C. Fraction of ARD bound to MBPCC1  
268 normalized to input (see methods). Control indicates amylose purification of cells only  
269 expressing ARD at 4°C. D. Bound ARD/MBP ratio vs Input ARD/MBP ratio showing that  
270 more ARD in the input correlates with increased ARD binding to MBPCC1 during  
271 purification.

272

273           The TRPA1 cryoEM structure contains a non-protein density at the interface  
274 between the coiled-coil and ARDs that was attributed to IP<sub>6</sub> (Fig 1B). We therefore tested  
275 whether IP<sub>6</sub>, temperature, and the electrophilic TRPA1 activator AITC altered MBPCC1-  
276 ARD interactions (Fig 5). Although AITC was added in the presence of intracellular  
277 proteins (i.e. cleared cell lysates) and reducing agent (2 mM TCEP), modification of  
278 cysteines by electrophilic activators occurs even in the reducing environment in intact  
279 cells/tissue *in vivo* to produce noxious sensation. At 4°C, there was no difference in the  
280 amount of ARD that co-purified with MBPCC1 in the absence or presence of IP<sub>6</sub> and AITC  
281 (Fig 5A,C). We next tested whether increasing temperature to 37°C would change binding  
282 (Fig 5B,C). Although there was a significant decrease in the amount of ARD pulled-down  
283 with CC1 at 37°C, binding was nonetheless above background levels (Fig 5B,C). When we  
284 plotted the ratio of ARD to MBPCC1 of input sample to the ratio of ARD to MBPCC1 in the  
285 amylose-bound sample we observed a correlation between the ratio of ARD:MBPCC1  
286 expressed and the fraction of ARD pulled-down. Notably, the ARD expression used in  
287 37°C experiments was generally less than that of experiments at 4°C (Fig 5D), suggesting  
288 a possible explanation for the lower co-purification we observed. In any case, at both 4°C  
289 (Fig 5A, C) and 37°C (Fig 5B, C) the ability of the ARDs to interact MBPCC1 was  
290 maintained in the presence or absence of IP<sub>6</sub> or AITC.

## 291 Discussion

292 In this study we aimed to develop a reduced *in vitro* system in which we could  
293 reconstitute the interactions of the N-terminal ARDs and the C-terminal coiled-coil  
294 observed in the full length human TRPA1 structure [15]. Our results show that the C-  
295 terminal coiled-coil can form tetramers (Fig 2 and Fig 4) and interact with the N-terminal  
296 ARDs (Fig 5) as observed in the full-length channel structure, key requirements for our *in*  
297 *vitro* system.

298 We used our system to test a number of hypotheses that could provide insight into  
299 how the cytoplasmic domains could be involved in channel gating. We showed that IP<sub>6</sub>  
300 was not required for structural stability of the TRPA1 C-terminal coiled-coil (Fig 2, 4) or the  
301 oligomeric stability of the interactions between the N-terminal ARDs and the C-terminal  
302 coiled-coil (Fig 5). We further showed that AITC was not required for the interaction  
303 between the ARDs and the coiled-coil in our isolated-domain system (Fig 5). We showed a  
304 reversible partial coiled-coil helix unwinding as temperature was increased (Fig 3),  
305 consistent with a model proposed by Arrigoni et al [35], but this helix unwinding did not  
306 fully abolish coiled-coil-ARD interactions (Fig 5). Helix unwinding may result in different  
307 physical space being occupied, pushing away or bringing closer the N-terminal ARDs. This  
308 can be accommodated by flexibility in the ARDs such as that observed in mouse TRPA1  
309 where an electrophilic activator altered the proteolytic accessibility of a loop between  
310 ARDs [14]. However, it is important to note that we cannot determine if this helix unwinding  
311 is involved in channel gating from our data. Together these data suggest that the role of  
312 intracellular polyphosphates and cysteine-modifying electrophilic compounds are more

313 complex than serving as just stabilizing ligands for N-terminal and C-terminal domain  
314 interactions.

## 315 **Materials and Methods**

### 316 **Molecular biology**

317 Human TRPA1 cDNA was a gift from Ajay Dhaka. CC1 (amino acids A1036-T1078) and  
318 CC2 (amino acids D1082-K113) were cloned into the Nco I and Hind III restriction sites in  
319 the pHMAL-c2TEV vector which contains an N-terminal poly-histidine tag followed by  
320 maltose-binding protein (gift from WNZ). The TRPA1 ARD construct (amino acids 446-  
321 639) was cloned into the pET28b vector using Nhe I and Sac I restriction sites in frame  
322 with an N-terminal poly-histidine tag.

### 323 **Fusion protein expression and purification**

324 MBP fusion proteins in the pHMAL-c2TEV vector were transformed into BL21(DE3)  
325 competent cells and grown at 37°C to OD<sub>600</sub> between 0.5-0.75 and protein expression was  
326 induced with 0.5 mM IPTG for 3.5 hours at 37°C. Harvested cells were suspended in 50 ml/L  
327 culture Buffer A1T (150 NaCl, 20 TrisHCl, pH 7.8, 2 mM TCEP) and stored at -20C until  
328 needed. Thawed cells were lysed via sonication after a ten minute incubation with a protease  
329 inhibitor cocktail containing PMSF (1 mM), Aprotinin (1 µg/ml), pepstatin (3 µg/ml), leupeptin  
330 (1 µg/ml). Lysed cells were cleared via centrifugation for 35 minutes at 30,000 x *g* in a  
331 Beckman JA-20 rotor. Cleared lysates were incubated with amylose resin (NEB) for 60  
332 minutes at 4°C and purified using gravity flow. Resin was washed with at least 15 column  
333 volumes of Buffer A1T and eluted with Buffer A1T supplemented with 20 mM maltose

334 (sigma). Protein was concentrated and subjected to size exclusion chromatography to  
335 remove maltose and used promptly for assays or stored at -20°C for future use.

336 Analytical size exclusion chromatography was performed using a Shimadzu HPLC with a  
337 Superdex 200 Increase column with Buffer A1T at room temperature (24°C). For SEC  
338 experiments at 32°C, protein was incubated at 32°C for 60' and run on SEC using column  
339 oven set to 32°C. Large scale preparative SEC runs carried out at 4°C showed no clear  
340 difference between those at 24°C though extensive analysis was not carried out at this  
341 condition. To determine the fraction of tetramer at different protein concentrations, the area  
342 under the absorption curve corresponding to the volume range where a gaussian fits at  
343 high concentration is divided by the total of area of protein absorption.

344 To isolate coiled-coil protein, TEV protease was added to protein at 1:500 dilution and  
345 incubated two hours at room temperature. The digested protein was then run over a  
346 HisPur cobalt column to remove excess MBP protein and dialyzed into a buffer containing  
347 100 mM NaCl, 20 mM Tris-HCl, pH 7.4 with or without IP<sub>6</sub>.

### 348 **Multi-Angle Light scattering**

349 Size-exclusion chromatography (Superdex 200 column) coupled with light scattering,  
350 refractive index, and ultraviolet absorption (SEC-LS-RI-UV) was done under the SEC-MAL  
351 system, which consisted of a P900 HPLC pump (GE), a UV-2077 detector (Jasco), a Tri  
352 Star Mini Dawn light scattering instrument (Wyatt), and an Opti Lab T-Rex refractive index  
353 instrument (Wyatt).

354

355

## 356 **Circular dichroism spectroscopy**

357 CD spectra of CC1 were collected on a Jasco J-1500 CD spectrometer. Samples  
358 contained 0.1 mg/ml (~20  $\mu$ M) protein in buffer containing 100 mM NaCl, 20 mM Tris-HCl,  
359 pH 7.4 with or without IP<sub>6</sub>. Samples were equilibrated at the indicated temperature for at  
360 least 10 minutes before measurement and measured in a 0.1-cm cuvette. Measurements  
361 were taken in continuous scanning mode with a scanning rate of 50 nm/min, data  
362 integration time of 2 s, and bandwidth of 1 nm. Data presented are an average of three  
363 scans, and data at wavelengths resulting in a high-tension value at or above the  
364 recommended 800-V cutoff were excluded.

## 365 **Binding Assays**

366 For binding assays ARD or ARD+MBP-CC1 was transformed into BL21(DE3) competent  
367 cells and grown at 37°C to OD<sub>600</sub> ~0.75. Protein expression was induced with .75 mM  
368 IPTG and cells were transferred to 25°C for 20-24 hours. Harvested cells were suspended  
369 in Buffer A1T and stored at -20°C until used for purification. Thawed cells were lysed via  
370 sonication after a ten-minute incubation with a protease inhibitor cocktail containing PMSF  
371 (1 mM), Aprotinin (1  $\mu$ g/ml), pepstatin (3  $\mu$ g/ml), leupeptin (1  $\mu$ g/ml). Lysed cells were  
372 cleared via centrifugation for 35 minutes at 30,000 x g in a Beckman JA-20 rotor. Cleared  
373 lysates were added to 50  $\mu$ L of equilibrated amylose resin and incubated at either 4°C or  
374 37°C for 60 minutes. Resin was washed four times with 500  $\mu$ L Buffer A1T and eluted with  
375 Buffer A1T supplemented with 20 mM maltose. For binding assays in the presence of IP<sub>6</sub>  
376 and/or AITC, each compound was added at least 10 minutes prior to lysis and included in  
377 both wash and elution buffers.



378 Since both MBP-CC1 and ARD contained N-terminal His-tags, they were both probed on  
379 Western Blot with anti-His primary antibody (QIAGEN) overnight at room temperature in  
380 TBST supplemented with 5% milk. Membranes were washed three times for five minutes  
381 with TBST and incubated with HRP conjugated anti-mouse IgG secondary antibody for 60'  
382 at room temperature. Membranes were then washed three times for five minutes with  
383 TBST and imaged after addition of ECL femto reagent. For quantification, ImageJ was  
384 used to determine regions of interest around each protein band. To determine the fraction  
385 of ARD bound, we took the ratio of amylose-purified ARD signal to input ARD signal and  
386 normalized by the fraction of MBP bound compared to input to compensate for having  
387 excess protein in the cell lysates. Each Western Blot used for the analysis of fraction  
388 bound ARD contained both input and amylose purified samples on the same blot. Thus,  
389 the Blots shown in Fig 5 were primarily used for illustrative purposes (though each  
390 contained one sample that could be used for quantification).

## 391 **Acknowledgments**

392 We would like to thank members of the Gordon and Zagotta labs for comments and  
393 discussions throughout the project. We thank Ajay Dhaka for the human TRPA1 DNA.

## 394 **References**

395

396 1. Nilius B, Appendino G, Owsianik G. The transient receptor  
397 potential channel TRPA1: from gene to pathophysiology. *Pflügers*  
398 *Archiv - European J Physiology*. 2012;464: 425–458.

399 doi:10.1007/s00424-012-1158-z

400

401 2. Sadofsky LR, Boa AN, Maher SA, Birrell MA, Belvisi MG, Morice  
402 AH. TRPA1 is activated by direct addition of cysteine residues to  
403 the N-hydroxysuccinyl esters of acrylic and cinnamic acids.

404 Pharmacol Res. 2011;63: 30–36. doi:10.1016/j.phrs.2010.11.004

405

406 3. Bandell M, Story GM, Hwang SW, Viswanath V, Eid SR, Petrus  
407 MJ, et al. Noxious Cold Ion Channel TRPA1 Is Activated by  
408 Pungent Compounds and Bradykinin. Neuron. 2004;41: 849–857.

409 doi:10.1016/s0896-6273(04)00150-3

410

411 4. Structural basis of TRPA1 inhibition by HC-030031 utilizing  
412 species-specific differences. Sci Reports. 2016;6: 37460.

413 doi:10.1038/srep37460

414

415 5. Laursen WJ, Anderson EO, Hoffstaetter LJ, Bagriantsev SN,  
416 Gracheva EO. Species-specific temperature sensitivity of TRPA1.

417 Temp. 2015;2: 214–226. doi:10.1080/23328940.2014.1000702

418

419 6. Story GM, Peier AM, Reeve AJ, Eid SR, Mosbacher J, Hricik TR,  
420 et al. ANKTM1, a TRP-like Channel Expressed in Nociceptive  
421 Neurons, Is Activated by Cold Temperatures. Cell. 2003;112: 819–  
422 829. doi:10.1016/s0092-8674(03)00158-2

423

424 7. Bautista DM, Pellegrino M, Tsunozaki M. TRPA1: A Gatekeeper  
425 for Inflammation. Annu Rev Physiol. 2013;75: 181–200.  
426 doi:10.1146/annurev-physiol-030212-183811

427

428 8. Geppetti P, Patacchini R, Nassini R, Materazzi S. Cough: The  
429 Emerging Role of the TRPA1 Channel. Lung. 2010;188: 63–68.  
430 doi:10.1007/s00408-009-9201-3

431

432 9. Ji R-R. Neuroimmune interactions in itch: Do chronic itch, chronic  
433 pain, and chronic cough share similar mechanisms? Pulm  
434 Pharmacol Ther. 2015;35: 81–86. doi:10.1016/j.pupt.2015.09.001

435

436 10. Moore C, Gupta R, Jordt S-E, Chen Y, Liedtke WB. Regulation  
437 of Pain and Itch by TRP Channels. *Neurosci Bull.* 2018;34: 120–  
438 142. doi:10.1007/s12264-017-0200-8

439

440 11. Moran MM, Szallasi A. Targeting nociceptive transient receptor  
441 potential channels to treat chronic pain: current state of the field.  
442 *Brit J Pharmacol.* 2018;175: 2185–2203. doi:10.1111/bph.14044

443

444 12. Jordt S-E, Bautista DM, Chuang H, McKemy DD, Zygmunt PM,  
445 Högestätt ED, et al. Mustard oils and cannabinoids excite sensory  
446 nerve fibres through the TRP channel ANKTM1. *Nature.* 2004;427:  
447 260. doi:10.1038/nature02282

448

449 13. Cavanaugh EJ, Simkin D, Kim D. Activation of transient receptor  
450 potential A1 channels by mustard oil, tetrahydrocannabinol and  
451 Ca<sup>2+</sup> reveals different functional channel states. *Neuroscience.*  
452 2008;154: 1467–1476. doi:10.1016/j.neuroscience.2008.04.048

453

454 14. Samanta A, Kiselar J, Pumroy RA, Han S, Moiseenkova-Bell  
455 VY. Structural insights into the molecular mechanism of mouse  
456 TRPA1 activation and inhibition. *The Journal of General Physiology*.  
457 2018;150: jgp.201711876. doi:10.1085/jgp.201711876

458

459 15. Structure of the TRPA1 ion channel suggests regulatory  
460 mechanisms. *Nature*. 2015;520: 511–517. doi:10.1038/nature14367

461

462 16. Fan C, Choi W, Sun W, Du J, Lu W. Structure of the human  
463 lipid-gated cation channel TRPC3. *eLife*. 2018;7: e36852.  
464 doi:10.7554/elife.36852

465

466 17. Vinayagam D, Mager T, Apelbaum A, Bothe A, Merino F,  
467 Hofnagel O, et al. Electron cryo-microscopy structure of the  
468 canonical TRPC4 ion channel. *eLife*. 2018;7: e36615.  
469 doi:10.7554/elife.36615

470

- 471 18. Tang Q, Guo W, Zheng L, Wu J-X, Liu M, Zhou X, et al.  
472 Structure of the receptor-activated human TRPC6 and TRPC3 ion  
473 channels. *Cell Res.* 2018;28: 746–755. doi:10.1038/s41422-018-  
474 0038-2  
475
- 476 19. Gao Y, Cao E, Julius D, Cheng Y. TRPV1 structures in  
477 nanodiscs reveal mechanisms of ligand and lipid action. *Nature.*  
478 2016;534: 347. doi:10.1038/nature17964  
479
- 480 20. Liao M, Cao E, Julius D, Cheng Y. Structure of the TRPV1 ion  
481 channel determined by electron cryo-microscopy. *Nature.* 2013;504:  
482 107. doi:10.1038/nature12822  
483
- 484 21. Cao E, Liao M, Cheng Y, Julius D. TRPV1 structures in distinct  
485 conformations reveal activation mechanisms. *Nature.* 2013;504:  
486 113. doi:10.1038/nature12823  
487
- 488 22. Duan J, Li Z, Li J, Santa-Cruz A, Sanchez-Martinez S, Zhang J,

489 et al. Structure of full-length human TRPM4. Proc National Acad  
490 Sci. 2018;115: 201722038. doi:10.1073/pnas.1722038115

491

492 23. Winkler PA, Huang Y, Sun W, Du J, Lü W. Electron cryo-  
493 microscopy structure of a human TRPM4 channel. Nature.  
494 2017;552: 200. doi:10.1038/nature24674

495

496 24. Autzen HE, Myasnikov AG, Campbell MG, Asarnow D, Julius D,  
497 Cheng Y. Structure of the human TRPM4 ion channel in a lipid  
498 nanodisc. Science. 2017;359: eaar4510.  
499 doi:10.1126/science.aar4510

500

501 25. Guo J, She J, Zeng W, Chen Q, Bai X, Jiang Y. Structures of  
502 the calcium-activated, non-selective cation channel TRPM4. Nature.  
503 2017;552: 205. doi:10.1038/nature24997

504

505 26. Yin Y, Wu M, Zubcevic L, Borschel WF, Lander GC, Lee S-Y.  
506 Structure of the cold- and menthol-sensing ion channel TRPM8.

507 Science. 2017;359: eaan4325. doi:10.1126/science.aan4325

508

509 27. Palovcak E, Delemotte L, Klein ML, Carnevale V. Comparative  
510 sequence analysis suggests a conserved gating mechanism for  
511 TRP channels. J Gen Physiology. 2015;146: 37–50.

512 doi:10.1085/jgp.201411329

513

514 28. Zimova L, Sinica V, Kadkova A, Vyklicka L, Zima V, Barvik I, et  
515 al. Intracellular cavity of sensor domain controls allosteric gating of  
516 TRPA1 channel. Sci Signal. 2018; doi:10.1126/scisignal.aan8621

517

518 29. Macpherson LJ, Dubin AE, Evans MJ, Marr F, Schultz PG,  
519 Cravatt BF, et al. Noxious compounds activate TRPA1 ion channels  
520 through covalent modification of cysteines. Nature. 2007;445: 541.

521 doi:10.1038/nature05544

522

523 30. Hinman A, Chuang H, Bautista DM, Julius D. TRP channel  
524 activation by reversible covalent modification. Proc National Acad



525 Sci. 2006;103: 19564–19568. doi:10.1073/pnas.0609598103

526

527 31. Kim D, Cavanaugh EJ. Requirement of a Soluble Intracellular  
528 Factor for Activation of Transient Receptor Potential A1 by Pungent  
529 Chemicals: Role of Inorganic Polyphosphates. J Neurosci. 2007;27:  
530 6500–6509. doi:10.1523/jneurosci.0623-07.2007

531

532 32. Feng Q. Current Topics in Membranes. Current topics in  
533 membranes. 2014. pp. 19–50. doi:10.1016/b978-0-12-800181-  
534 3.00002-6

535

536 33. Voets T. TRP Channels and Thermosensation. Handbook of  
537 experimental pharmacology. 2014. pp. 729–741. doi:10.1007/978-3-  
538 319-05161-1\_1

539

540 34. Clapham DE, Miller C. A thermodynamic framework for  
541 understanding temperature sensing by transient receptor potential  
542 (TRP) channels. Proc National Acad Sci. 2011;108: 19492–19497.

543 doi:10.1073/pnas.1117485108

544

545 35. Arrigoni C, Rohaim A, Shaya D, Findeisen F, Stein RA, Nurva  
546 SR, et al. Unfolding of a Temperature-Sensitive Domain Controls  
547 Voltage-Gated Channel Activation. *Cell*. 2016;164: 922–936.

548 doi:10.1016/j.cell.2016.02.001

549

550 36. Zhu J, Yu Y, Ulbrich MH, Li M, Isacoff EY, Honig B, et al.  
551 Structural model of the TRPP2/PKD1 C-terminal coiled-coil complex  
552 produced by a combined computational and experimental approach.  
553 *Proc National Acad Sci*. 2011;108: 10133–10138.

554 doi:10.1073/pnas.1017669108

555

556 37. Qian F, Germino FJ, Cai Y, Zhang X, Somlo S, Germino GG.  
557 PKD1 interacts with PKD2 through a probable coiled-coil domain.  
558 *Nat Genet*. 1997;16: ng0697-179. doi:10.1038/ng0697-179

559

560 38. Lupas A, Van Dyke M, Stock J. Predicting coiled coils from

561 protein sequences. *Sci New York N Y.* 1991;252: 1162–4.

562 doi:10.1126/science.252.5009.1162

563

564 39. Robinson JM, Deutsch C. Coupled Tertiary Folding and

565 Oligomerization of the T1 Domain of Kv Channels. *Neuron.*

566 2005;45: 223–232. doi:10.1016/j.neuron.2004.12.043

567

568 40. Strang C, Cushman SJ, DeRubeis D, Peterson D, Pfaffinger PJ.

569 A Central Role for the T1 Domain in Voltage-gated Potassium

570 Channel Formation and Function. *J Biol Chem.* 2001;276: 28493–

571 28502. doi:10.1074/jbc.m010540200

572

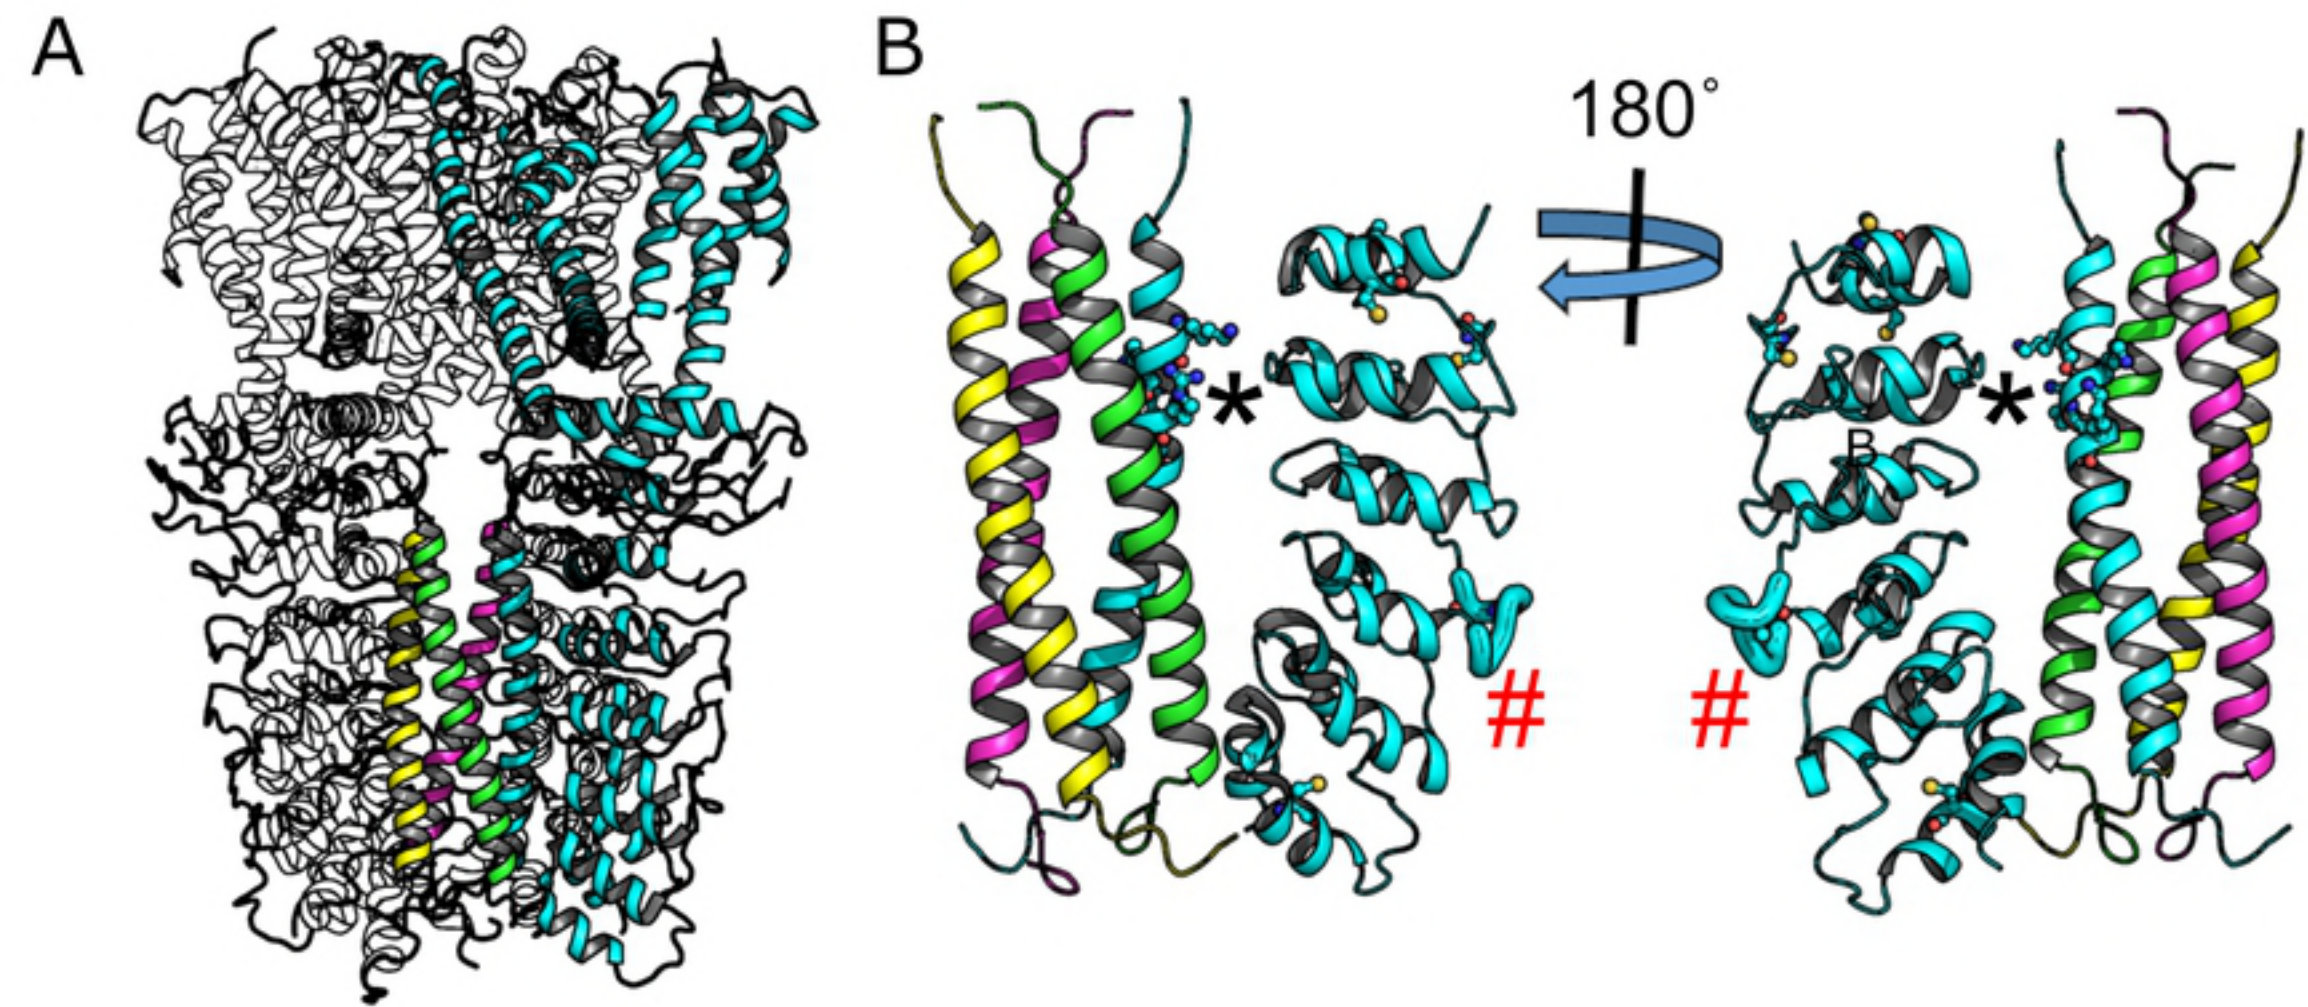

Figure 1

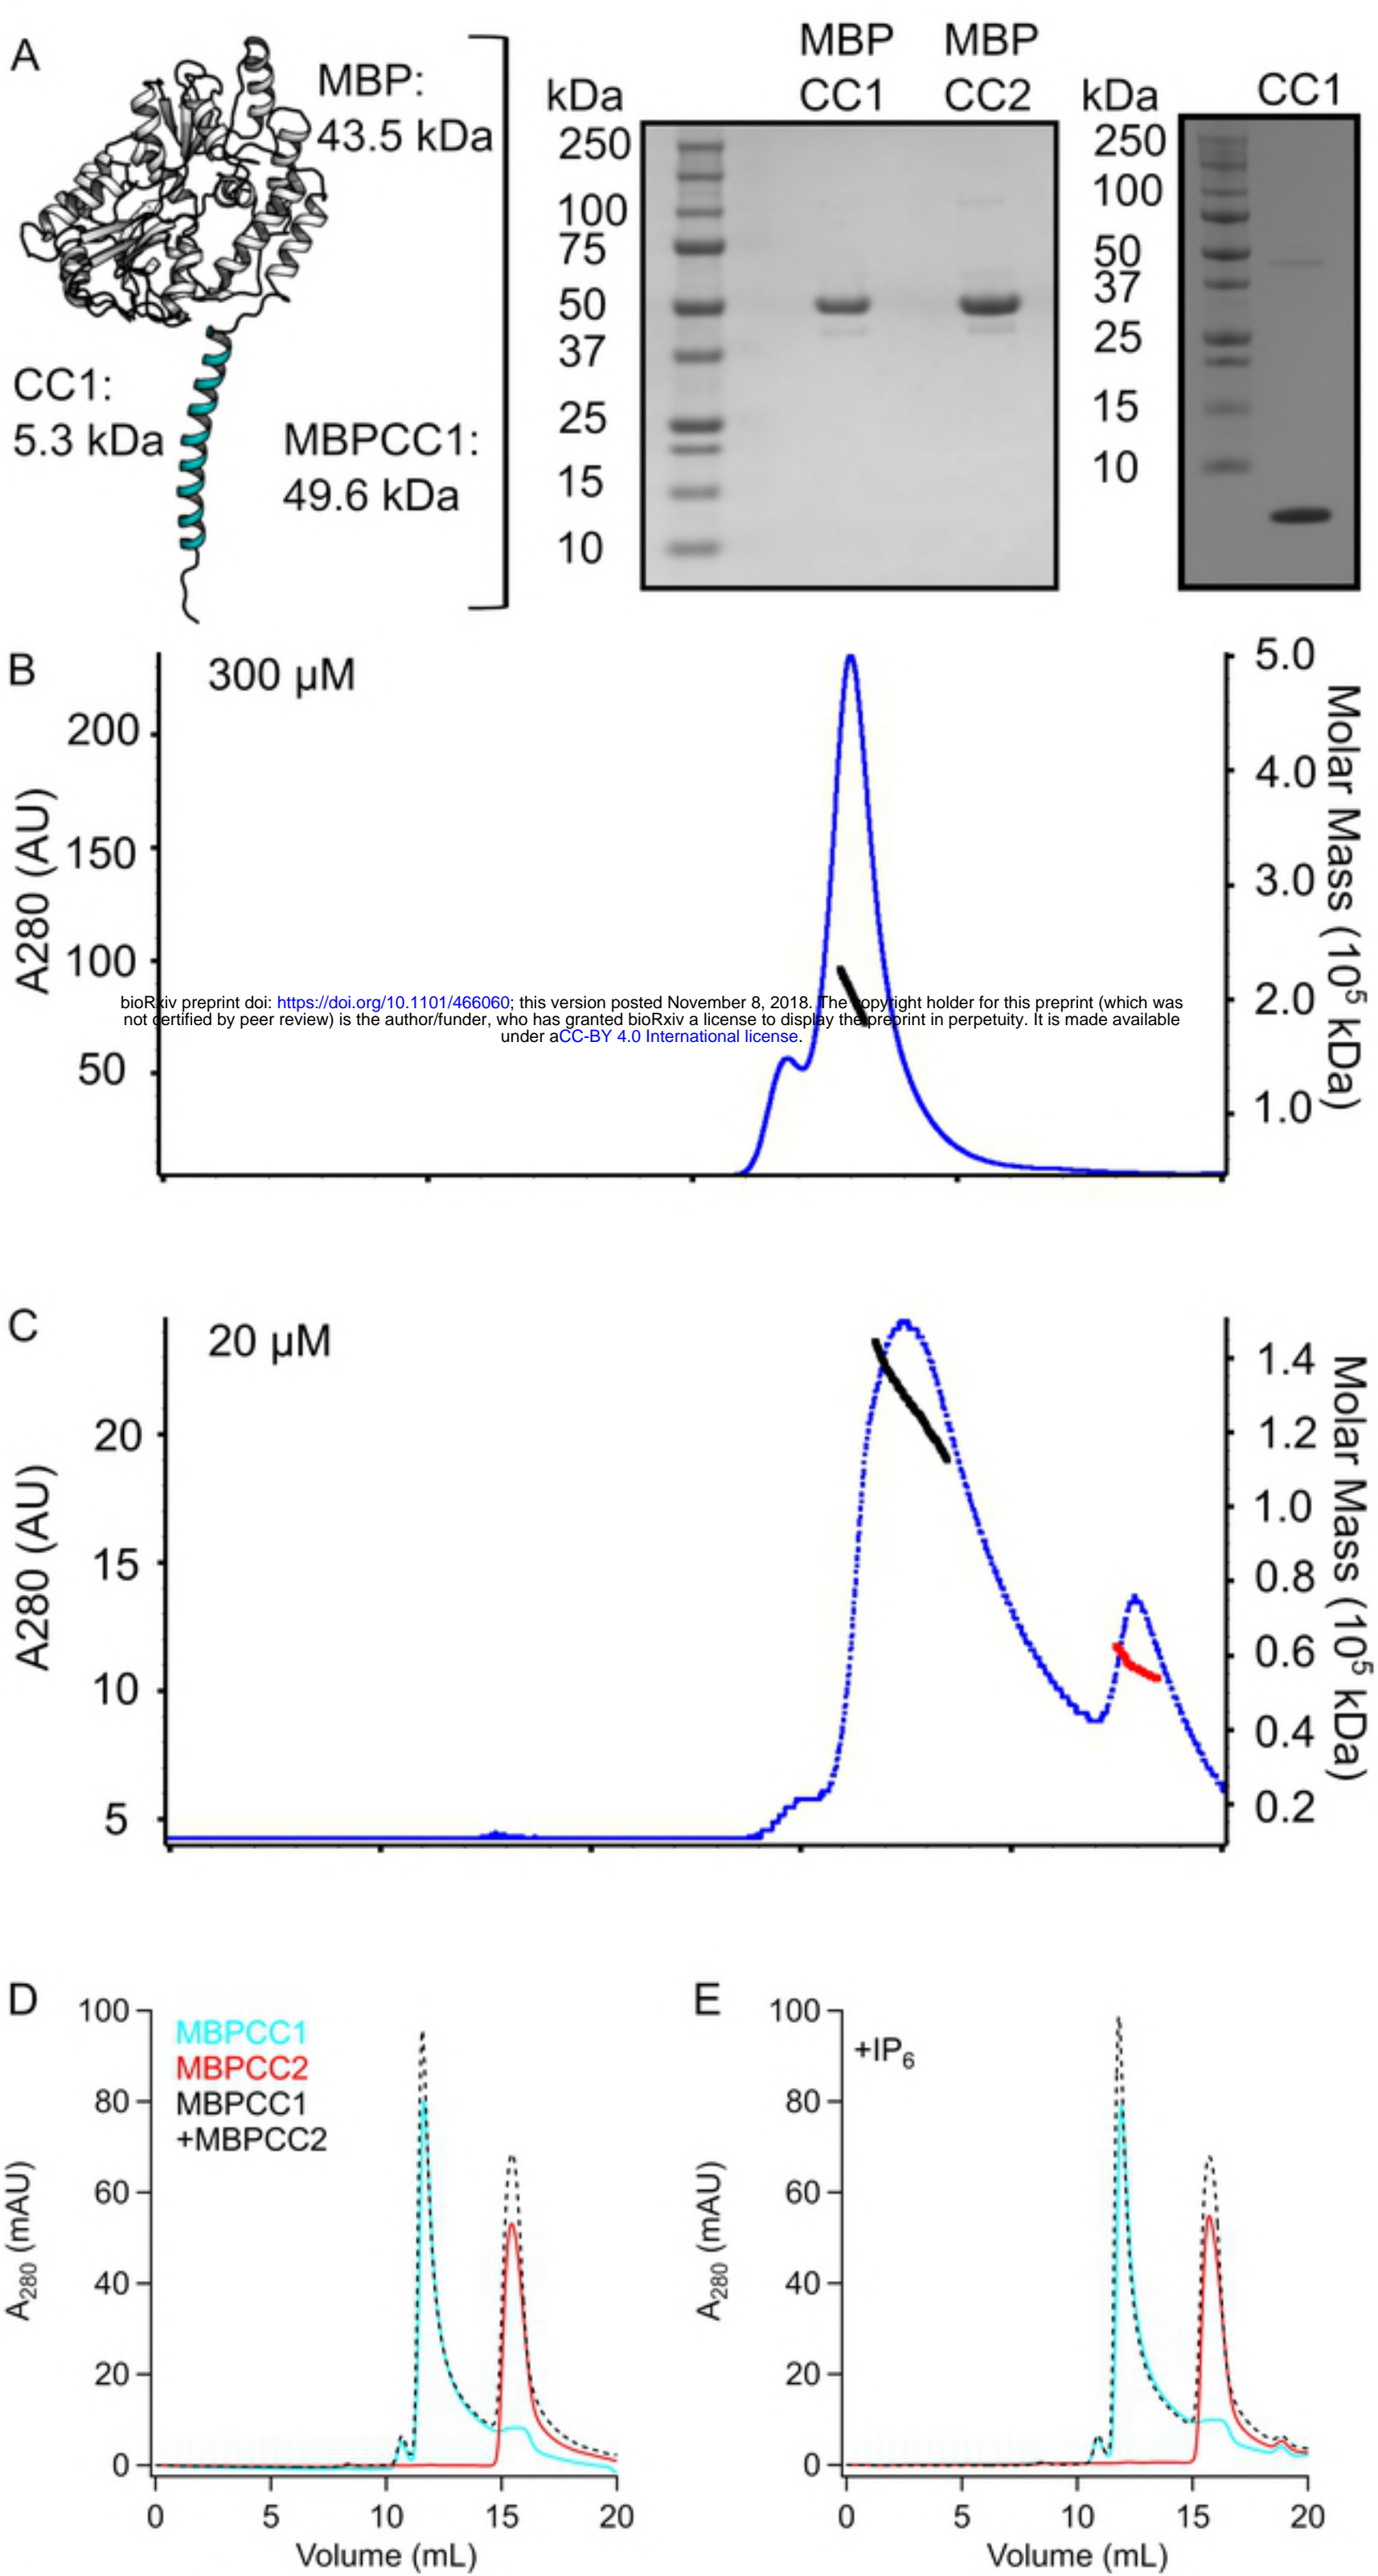

Figure 2

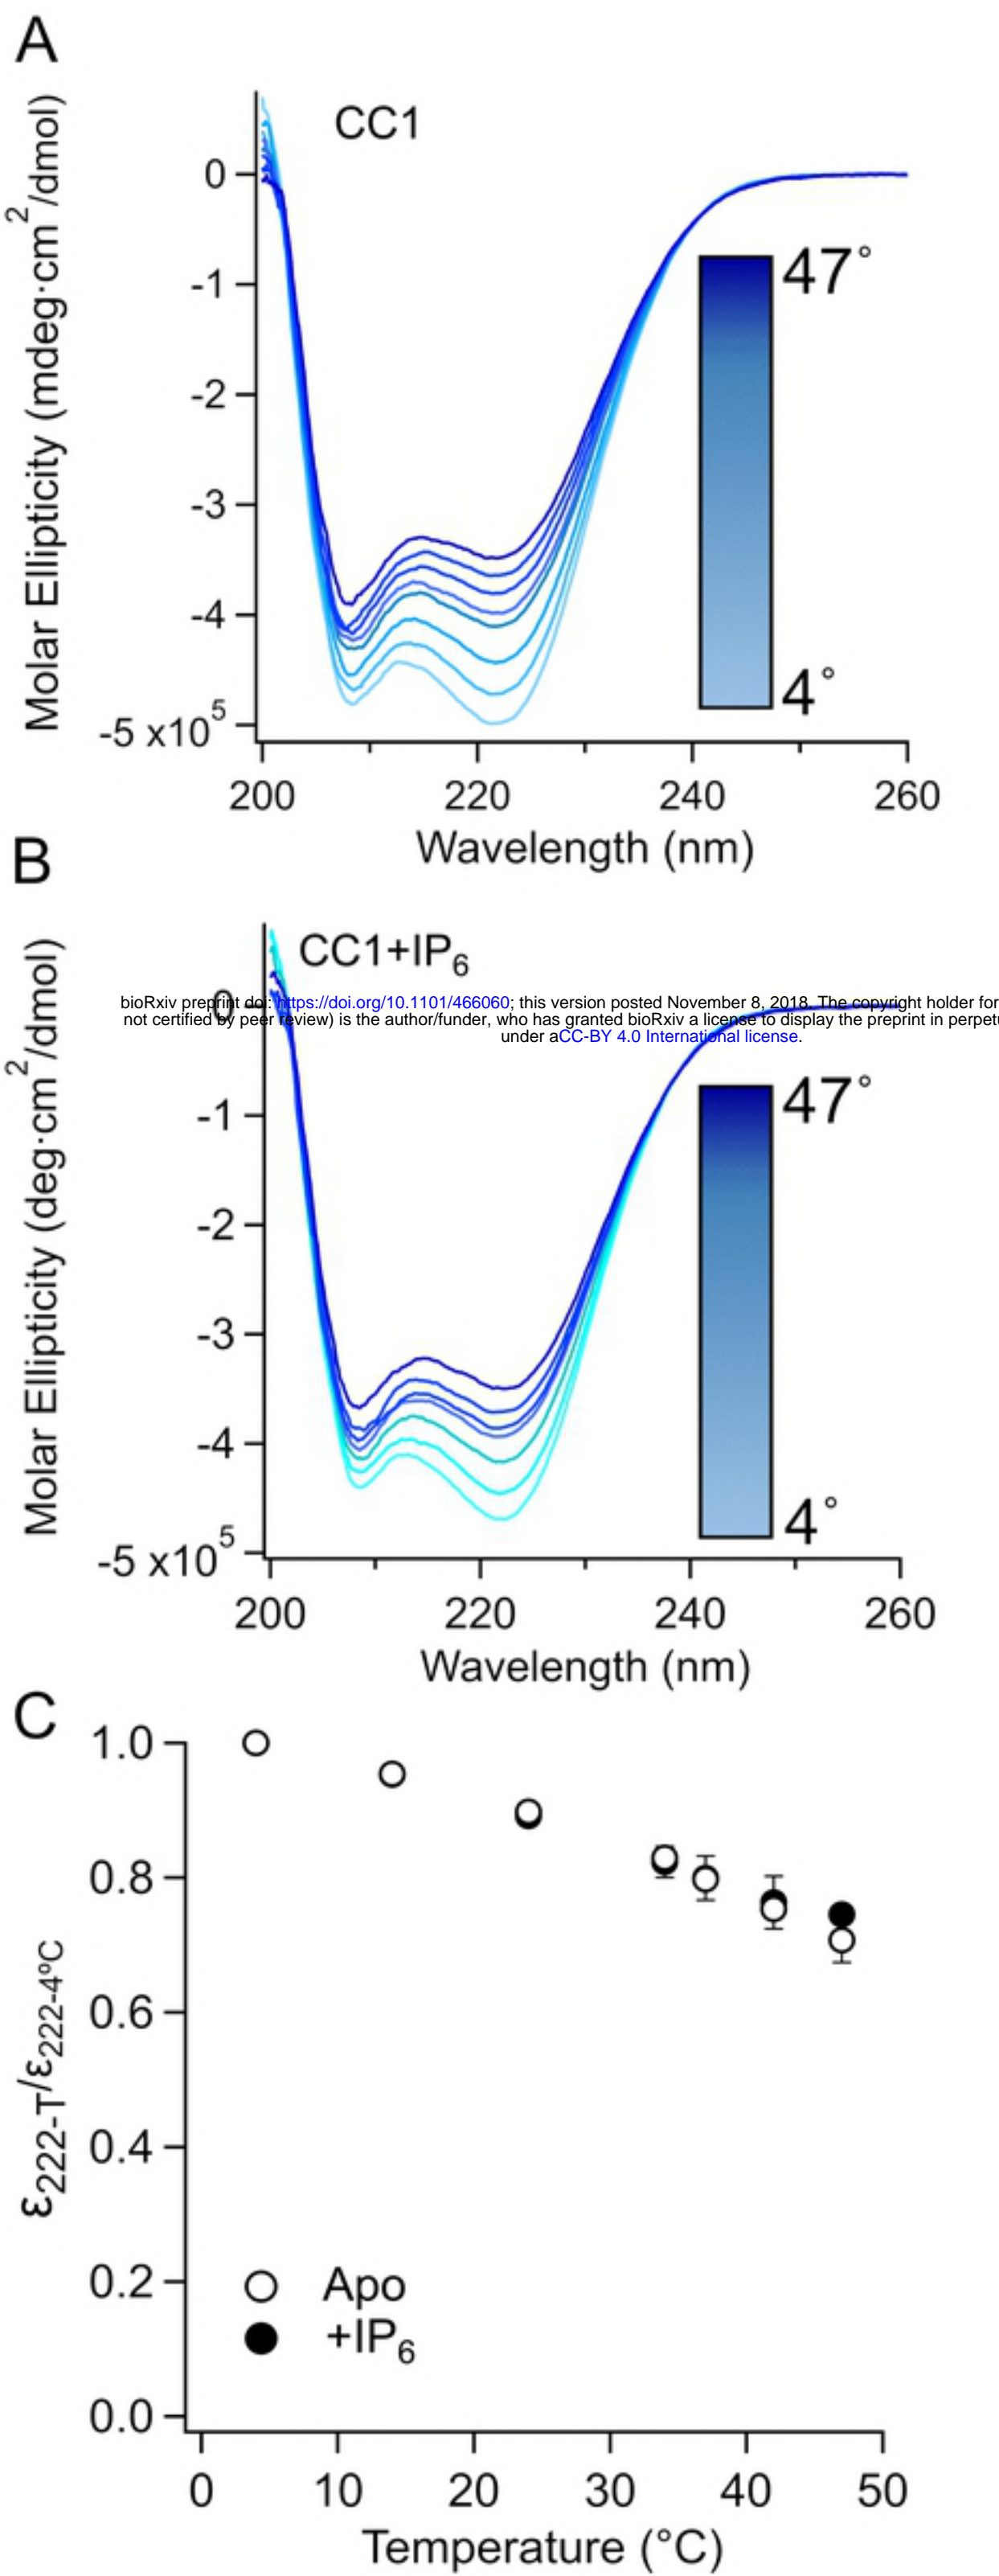

Figure 3

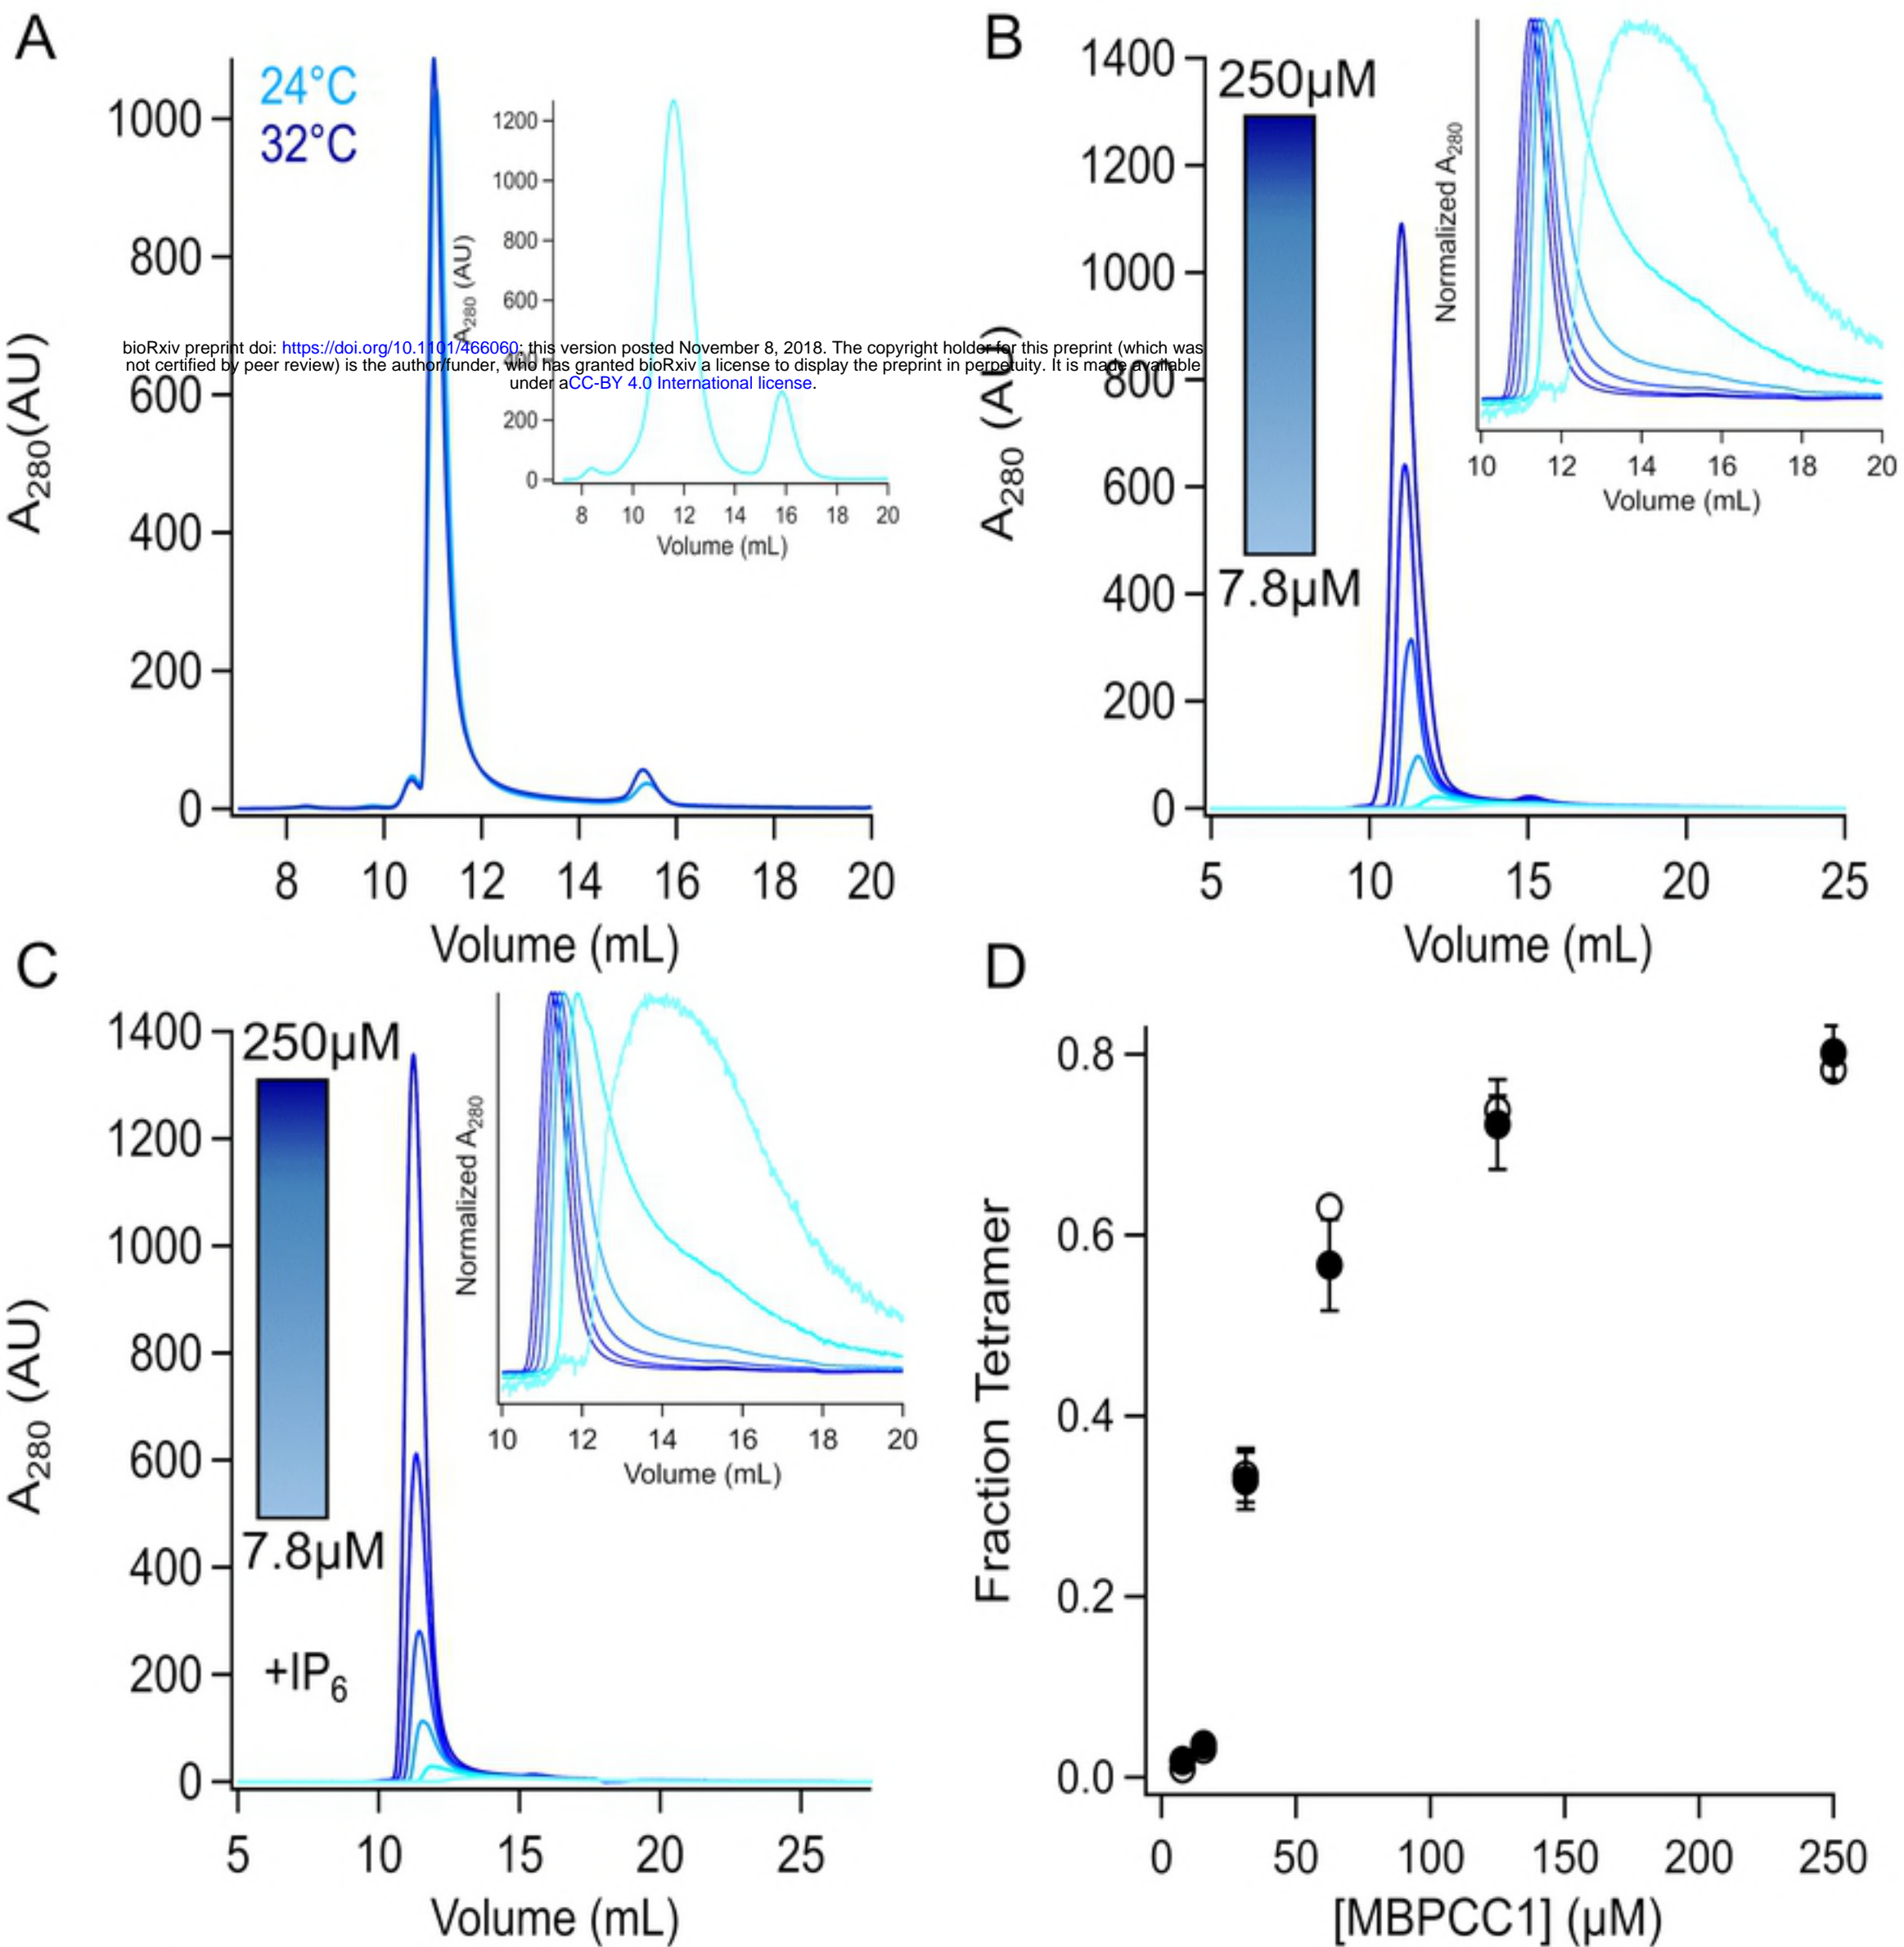

Figure 4

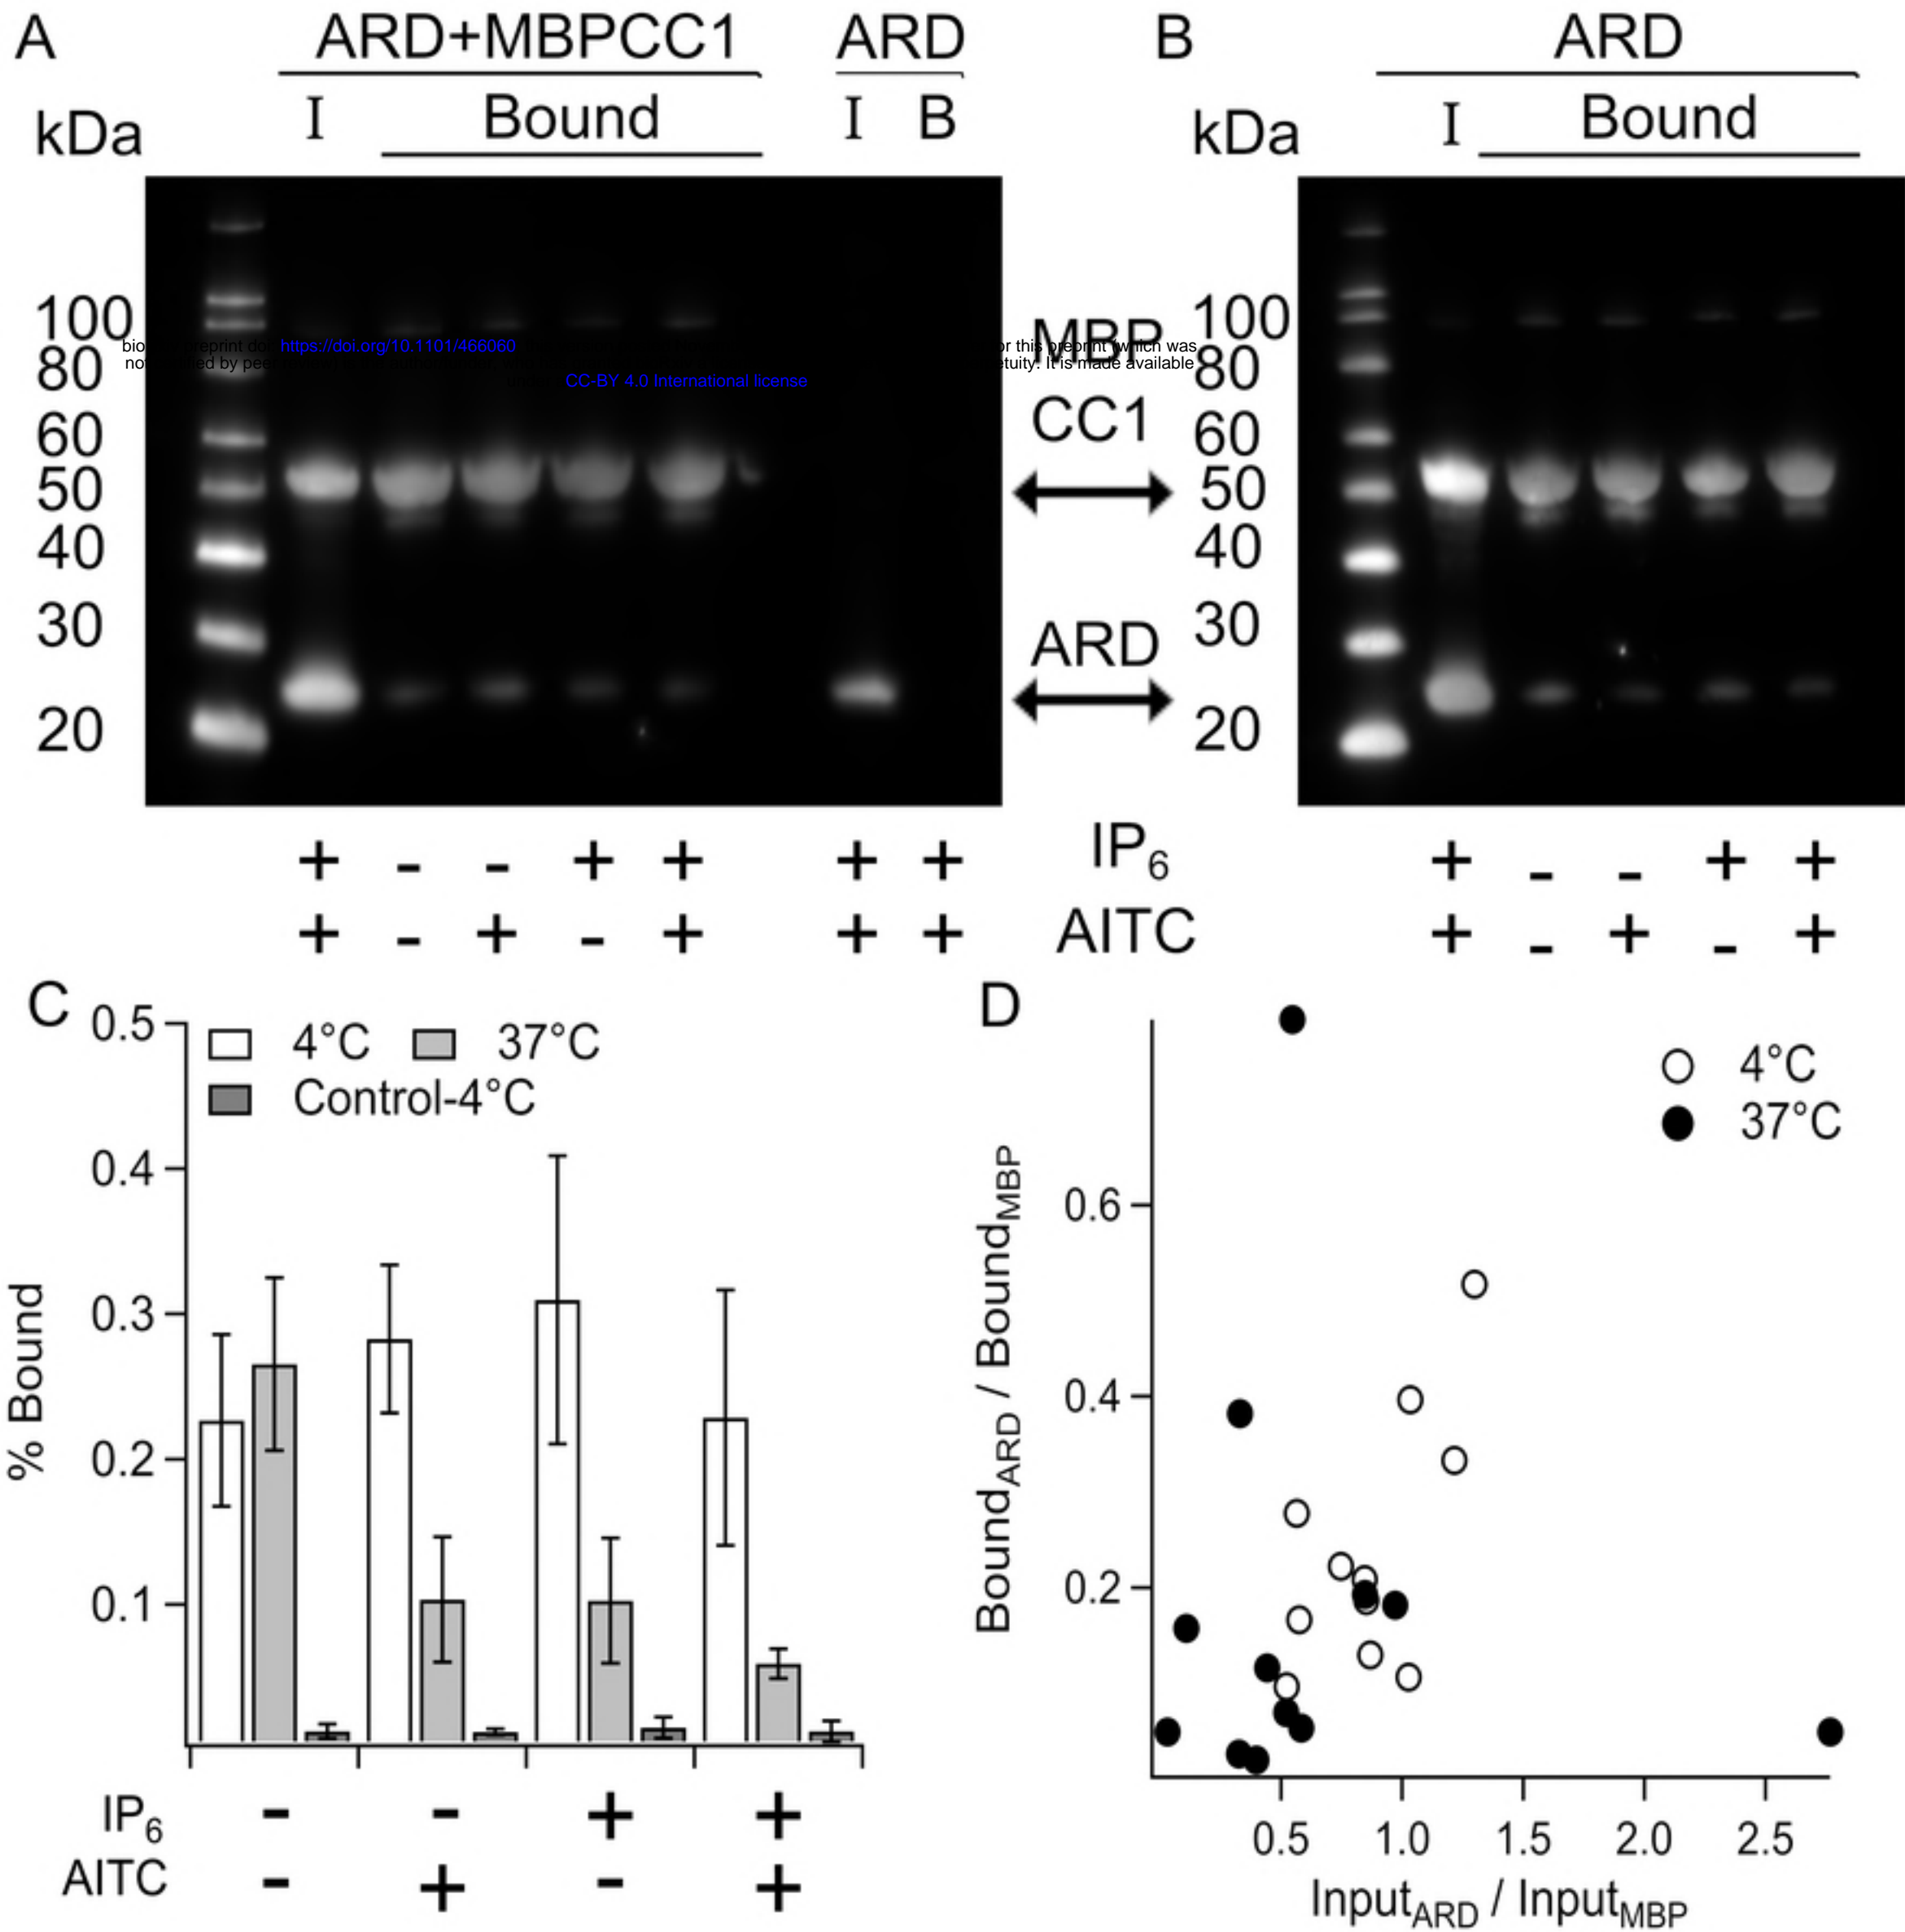

Figure 5
